# Supplementary figures and images for: A New Intra-Specific and High-Resolution Genetic Map of Eggplant Based on a RIL Population, and Location of QTLs Related to Plant Anthocyanin Pigmentation and Seed Vigour
Source: MDPI journal article supplement (doi:10.3390/genes11070745), 2020-07-04

**E01**

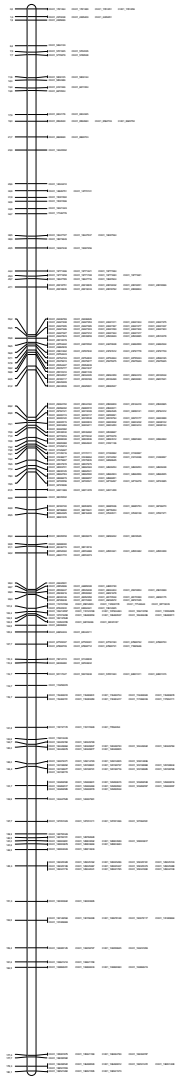

**E02**

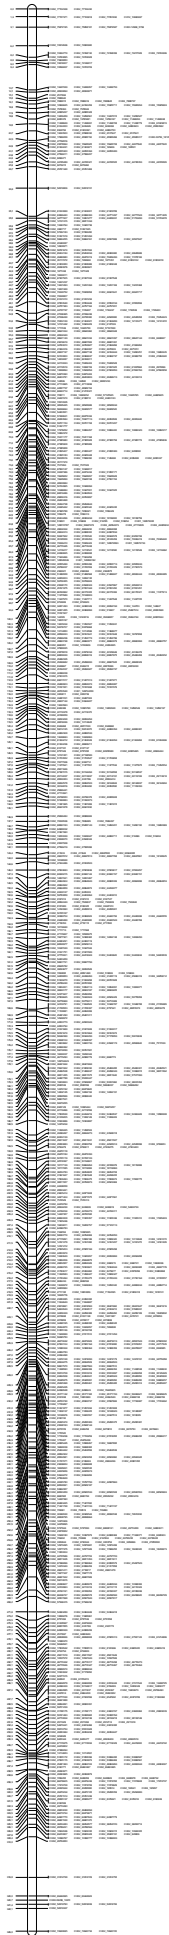

**E03**

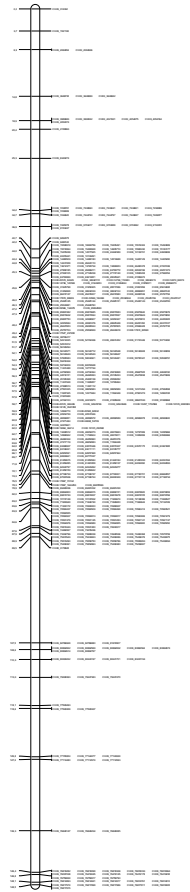

**E04**

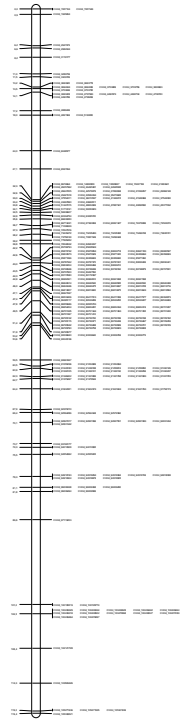

**E05**

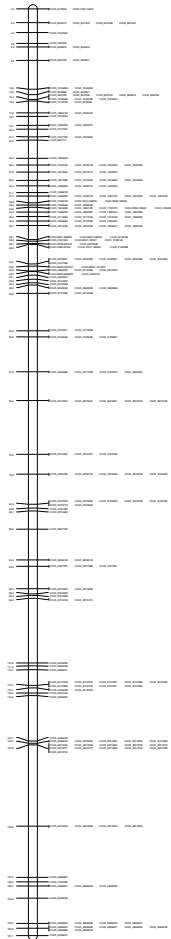

**E06**

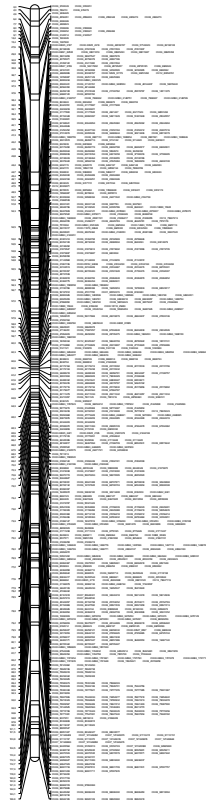

**E07**

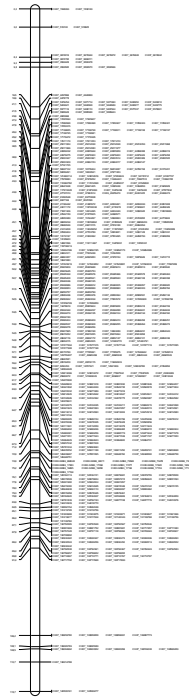

**E08**

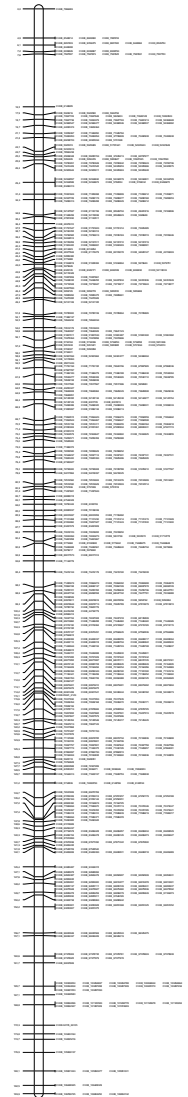

E09

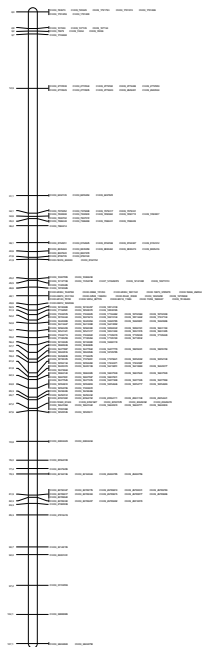

E10

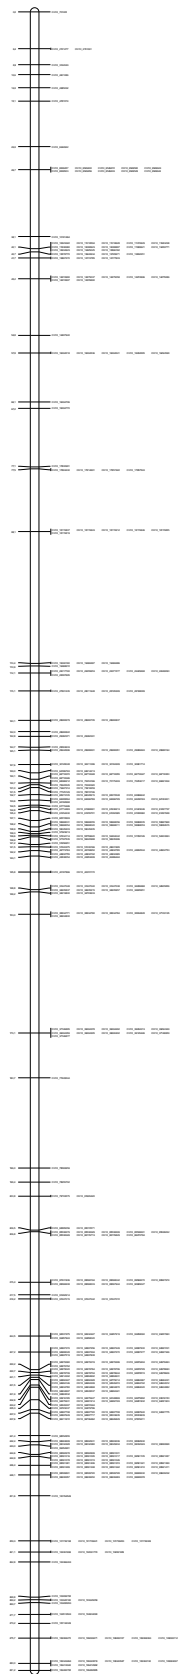

E11

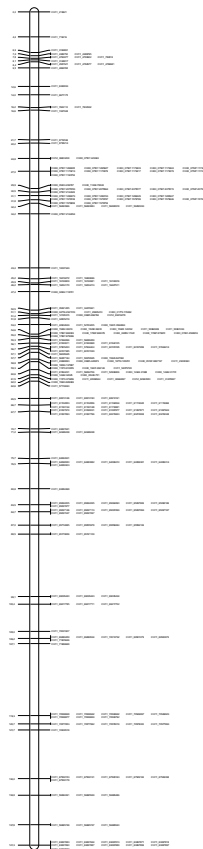

E12

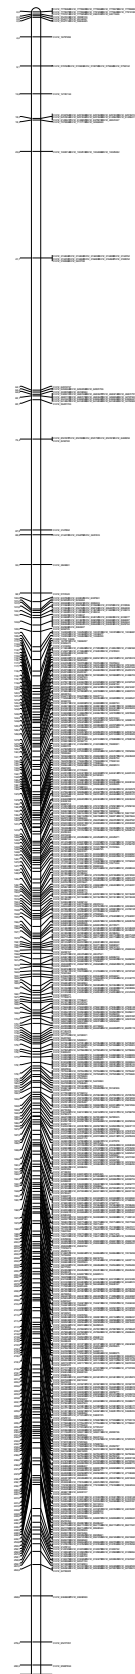

Supplement: s1 [file s1]
